# Supplementary material
Source: Research Square preprint supplement (doi:10.21203/rs.3.rs-9647215/v1)
Supplement: Supplementary file 1 [file 5653f23c077a68a6a0439ec1.docx]

**Supplementary Material**

**Body Image Dimensions Predicting Eating Disorder Symptoms**

We conducted a regression with all measures included (i.e., attitudinal, behavioral and perceptual), predicting eating disorder (EDE-Q) symptoms*.* The regression model was statistically significant, *F*(8, 253) = 159.93, *p* < .001, with an *R*² of 0.84, indicating that the combined body image disturbance measures and BMI accounted for approximately 84% of the variance in EDE-Q global scores. This represents a very large effect size (Gignac & Szodorai, 2016). All predictors were assessed for multicollinearity; tolerance values were all greater than 0.1 and variance inflation factors were all below 10, indicating no serious multicollinearity (Gignac, 2023). Examination of individual predictors using standardized beta weights revealed that evaluative and behavioral measures – BSQ-8C, β = 0.59, *p* < .001, and BCQ, β = 0.22, *p* < .001 – were the strongest predictors of eating disorder symptoms. Positive evaluative measure BAS-2 was a significant predictor but in a negative direction, *β* = -0.09, *p* = .020 while BIAQ was not, *β* = 0.08, *p* = .060. Within this full model, perceptual measures regression to the mean slope (BL RTM), *β* = 0.03, *p* = .279; FRS discrepancy scores (FRS_Stunkard_Discrep), *β* = -0.02, *p* = .629 and serial dependence (BL SerDep), *β* = -0.04, *p* = .101; were not significant unique predictors of eating disorder symptoms. BMI was also not a significant predictor in this model, *β* = 0.04, *p* = .188. These findings demonstrate that attitudinal and behavioral measures are robust predictors of eating disorder symptoms, consistent with prior literature. However, the perceptual measures included in this model did not significantly predict eating disorder symptoms when attitudinal and behavioral factors were included. This suggests that while perceptual measures contribute to body image disturbance, they do not contribute unique variance when combined with attitudinal and behavioral measures.

**Body Image Dimensions Predicting Body Dysmorphic Symptoms**

We conducted a regression with all measures included (i.e., attitudinal, behavioral and perceptual), predicting dysmorphic disorder (DCQ) symptoms. The regression model was statistically significant, *F*(4, 253) = 41.98, *p* < .001, with an *R*² of ­0.57, indicating that the combined body image disturbance measures and BMI accounted for approximately 57% of the variance in DCQ total scores. This represents a large effect size (Gignac & Szodorai, 2016). All predictors were assessed for multicollinearity; tolerance values were all greater than 0.1 and variance inflation factors were all below 10, indicating no serious multicollinearity (Gignac, 2023). Examination of individual predictors using standardized beta weights revealed that the two behavioral measures of body image disturbance, BIAQ, *β* = 0.27, *p* < .001, and BCQ, *β* = 0.23, *p* = .002, were also the strongest unique predictors of dysmorphic concern. Of the evaluative scales, BAS-2 was again a significant predictor but in a negative direction, *β* = -0.23, *p* < .001, and here the BSQ-8C was also a significant predictor, *β* = 0.20, *p* = .020. In the perceptual measures, the figure rating scale discrepancy scores (FRS), *β* = -0.14, *p* = .024, emerged as a significant unique predictor, though in a negative direction. However, our other two perceptual measures, BL regression to the mean (BL RTM), *β* = 0.01, *p* = .895 and BL serial dependence (BL SerDep), *β* = -0.01, *p* = .834, were not significant unique predictors of dysmorphic concern. Finally, BMI was not a significant unique predictor, *β* = -0.05, *p* = .373. These findings demonstrate that all four of our attitudinal and behavioral measures are robust predictors of dysmorphic concern. The perceptual measure of FRS discrepancy also significantly predicted dysmorphic concern, albeit with a smaller effect size compared to the attitudinal and behavioral measures and our other two perceptual measures were not significant. This suggests that certain perceptual measures do significantly contribute to dysmorphic concern, but their unique contribution is clearly less pronounced than that of attitudinal and behavioral factors, in a combined model.
